# Supplementary material for: Correlation Analysis between Optical Coherence Tomography Parameters of Neovascular Age-Related Macular Degeneration and Visual Prognosis at 2 Months after Anti-VEGF Therapy
Source: Research Square preprint supplement (doi:10.21203/rs.3.rs-8383468/v1), 2026-02-16
Supplement: Supplementary file 1 [file b59b24542c85ef3448dcb5ce.xlsx]

## Sheet: 修改后原始数据
	档案日期	档案编号	姓名	Gender	Age	Eye	Medication Used	Pre-op LOGMAR Visual Acuity	Post-op 2-Month LOGMAR Visual Acuity	BMI	CMT	Retinal Edema	Hard Exudates	Cystic Changes	SHRM & EZ Integrity	Hyperreflective Foci (HF)	Hemorrhages	Subretinal fluid (SRF)	Pigment epithelium detachment (PED)	RPE Tear	Fibrosis	dis	prognosis
1	2021.8.30	40773	孙作山	1	78	1	2	2	2.5	21.8	4000	0	0	0	0	0	0	0	0	0	0	0.5	Good prognosis
3	2022.2.26	42822	靳焕竹	0	79	1	2	2	2	24.3141239657425	800	1	0	0	0	1	1	0	1	0	0	0	Good prognosis
4	NA	NA	郭香格	0	77	1	3	1.2	2	27.9421433267587	600	1	1	0	1	0	0	0	0	0	1	0.8	Good prognosis
5	NA	NA	李仲修	1	72	0	3	2	2	24.3	725	0	0	0	1	1	1	1	1	0	0	0	Good prognosis
6	NA	NA	徐焕柏	1	86	1	3	2	2	25.4	608	0	0	1	1	1	0	0	1	0	1	0	Good prognosis
9	2021.8.4	40549	张凤荣	0	72	0	1	1	0.9	26	589	1	0	0	0	1	0	0	1	1	0	-0.1	Good prognosis
10	2022.1.5	42154	李爱林	1	66	0	2	0.698970004336019	0.8	25.4	556	0	0	0	1	0	0	1	0	0	0	0.101029995663981	Good prognosis
11	2020.3.23	34620	魏素芳	0	74	0	2	0.698970004336019	0.7	21.2585034013605	662	0	0	0	1	1	0	0	1	0	1	0.00102999566398099	Good prognosis
13	2021.9.20	40952	刘顺国	1	72	0	2	0.795880017344075	0.7	20.9	622	0	1	0	0	0	1	1	0	0	0	-0.09588	Good prognosis
14	2022.1.26	42096	王美青	0	71	1	2	0.602059991327962	0.6	24.4897959183673	622	1	0	0	0	1	0	0	1	0	0	-0.00205999	Good prognosis
16	2020.6.29	35832	纪志坤	1	63	1	3	0.522878745280338	0.5	28.9	655	0	0	0	0	0	0	1	0	0	0	-0.0228787	Good prognosis
18	2022.1.10	42194	雷社霞	0	52	0	3	0.301029995663981	0.4	25.3515413737155	555	1	0	0	0	0	0	0	0	1	1	0.098970004336019	Good prognosis
23	2020.3.9	34446	薛兆民	1	84	0	2	1.39794000867204	1.7	25.7	601	1	0	1	1	0	0	1	0	1	0	0.30205999132796	Good prognosis
24	2021.12.8	41815	郭章兰	1	77	0	2	1.30102999566398	1.7	28.1336565096953	736	0	0	1	0	1	1	0	0	0	0	0.39897000433602	Good prognosis
25	2020.7.13	28417	管新庄	1	86	1	2	1.69897000433602	1.7	24.6	768	0	0	0	0	0	0	0	1	0	1	0.00102999566397988	Good prognosis
27	2021.9.6	40843	光正朋	1	53	1	2	1.30102999566398	1.4	21.1	423	0	0	0	1	0	1	1	0	0	0	0.09897000433602	Good prognosis
29	2021.6.17	39953	吕建成	1	80	1	2	1.39794000867204	1.4	26.3	1030	1	0	1	1	1	0	0	1	0	1	0.00205999132795998	Good prognosis
30	2021.5.17	39633	王素梅	0	58	0	1	1.22184874961636	1.4	25.1559	882	0	1	0	0	1	0	0	0	0	0	0.17815125038364	Good prognosis
31	2021.4.6	39106	彭福生	1	80	1	1	1.22184874961636	1.3	24.8015873015873	891	0	0	0	0	0	0	1	1	0	1	0.0781512503836401	Good prognosis
34	2020.8.8	36310	常进府	1	63	0	2	1.09691001300806	1.2	20.9	546	0	0	0	0	0	0	0	0	0	0	0.10308998699194	Good prognosis
35	2020.4.29	35090	陈养梅	0	74	1	3	1.09691001300806	1.2	25.3906	638	1	0	0	1	1	0	0	0	0	1	0.10308998699194	Good prognosis
36	2021.1.20	38145	娄青莲	0	69	1	3	1.22184874961636	1.2	25.9	611	0	0	1	0	0	1	0	1	1	0	-0.0218487	Good prognosis
39	2021.5.12	39121	苏现聚	1	77	0	1	1	1.1	23.5	717	1	0	1	1	0	0	1	0	0	1	0.1	Good prognosis
46	2020.6.29	35825	赵现英	0	53	1	2	0.920818753952375	1	25.9515570934256	458	0	0	0	0	1	0	0	1	0	0	0.079181246047625	Good prognosis
47	2021.2.24	38497	裴书玉	1	69	1	2	1	1	20.3	779	0	0	0	1	0	1	1	0	1	1	0	Good prognosis
48	2021.3.16	38856	邵东银	1	82	0	2	1.09691001300806	1	26.4	935	1	0	1	0	0	0	0	1	0	0	-0.09691	Good prognosis
50	2021.10.11	41198	刘许法	1	68	0	2	1	1	21.7	566	0	0	0	0	0	0	0	0	0	0	0	Good prognosis
51	2021.1.12	38080	薛振锁	1	85	1	1	1.09691001300806	1	22.5	787	0	0	0	1	1	1	1	0	0	0	-0.09691	Good prognosis
52	2021.2.24	38497	裴书玉	1	69	0	2	1.09691001300806	1	24.4	385	1	0	0	0	0	0	1	0	0	1	-0.09691	Good prognosis
56	2021.6.17	39953	吕建成	1	80	0	2	1	0.9	29.1	778	0	0	1	1	0	0	0	0	1	0	-0.1	Good prognosis
57	2022.3.21	43077	聂改梅	0	84	0	2	1	0.9	25.7	648	1	0	0	0	1	1	0	0	1	0	-0.1	Good prognosis
58	2022.8.17	44881	孙贵民	1	68	1	2	0.823908740944319	0.8	22.038567493113	274	0	0	1	0	0	0	0	0	0	0	-0.0239087	Good prognosis
60	2020.7.29	36199	刘素英	0	76	1	3	0.823908740944319	0.8	22.1	868	1	0	0	0	0	0	1	0	0	0	-0.0239087	Good prognosis
65	2021.7.19	40362	张桂姣	0	70	1	1	0.602059991327962	0.7	26.5	330	1	0	0	0	1	0	0	0	0	0	0.097940008672038	Good prognosis
67	NA	NA	伍刚	1	50	1	1	0.7	0.7	26.7	230	0	0	0	1	0	0	0	0	0	0	0	Good prognosis
73	2021.5.17	39647	张云秋	0	75	0	1	0.522878745280338	0.6	21.3	265	0	0	1	0	1	0	0	1	0	0	0.077121254719662	Good prognosis
74	2021.5.17	39633	王素梅	0	58	1	1	0.698970004336019	0.6	22.8928199791883	567	1	0	1	0	0	0	1	0	0	0	-0.09897	Good prognosis
78	2022.2.23	42743	谷香莲	0	74	0	1	0.522878745280338	0.5	18.7	478	0	0	0	0	1	0	0	0	0	0	-0.0228787	Good prognosis
88	2021.7.26	40463	孔伟功	1	64	0	2	0.301029995663981	0.4	22.9	456	0	0	0	0	0	0	0	0	0	0	0.098970004336019	Good prognosis
91	2021.7.26	40451	徐香珍	0	65	0	3	0.397940008672038	0.4	25.1	687	1	0	0	0	0	0	0	0	1	0	0.00205999132796203	Good prognosis
96	2020.11.30	37656	李启怀	1	51	0	1	0.397940008672038	0.3	22.9	886	0	0	0	0	0	1	0	1	0	0	-0.09794	Good prognosis
97	2021.1.18	38118	宋毅	1	77	0	3	0.397940008672038	0.3	28.3	238	0	0	0	0	0	0	0	1	0	0	-0.09794	Good prognosis
2	2022.2.21	42742	吴成峰	1	69	1	2	2.5	2	23.4375	504	1	0	1	1	1	0	1	0	1	1	-0.5	Poor prognosis
7	2020.9.28	36909	孔东田	0	75	0	3	1.30102999566398	1.1	27.6887781337764	439	0	1	0	1	1	1	1	0	0	1	-0.20103	Poor prognosis
8	2022.2.7	42439	刘艳琛	1	76	0	2	1.30102999566398	1.1	19.5918367346939	680	0	0	1	1	1	1	1	0	1	1	-0.20103	Poor prognosis
12	2022.1.18	42261	刘增印	1	70	0	2	1.22184874961636	0.7	23.4	777	1	1	1	0	1	0	1	0	0	0	-0.521849	Poor prognosis
15	2020.5.25	35463	卓付长	1	81	0	3	0.823908740944319	0.5	20.5	379	0	0	1	1	0	0	1	1	1	1	-0.323909	Poor prognosis
17	2021.9.13	40904	曹武军	1	49	0	2	0.602059991327962	0.5	25.1	317	0	1	1	0	0	0	1	0	0	0	-0.10206	Poor prognosis
19	2021.11.16	41613	陈庆春	1	56	1	2	0.698970004336019	0.4	27.5	549	0	1	1	1	0	1	1	1	1	1	-0.29897	Poor prognosis
20	2021.8.4	40549	张凤荣	0	72	1	1	0.522878745280338	0.3	24.5674740484429	256	1	1	1	0	1	0	0	1	0	1	-0.222879	Poor prognosis
21	2022.7.21	44464	刘丽丽	0	54	1	2	0.522878745280338	0.3	27.3	306	0	0	1	0	0	1	1	1	1	0	-0.222879	Poor prognosis
22	2020.3.6	34424	孟梅菊	0	66	1	2	2	1.7	20.5	632	1	1	1	0	0	1	0	1	1	1	-0.3	Poor prognosis
26	2020.4.26	35037	娄相军	1	69	1	2	2	1.4	26.3	700	1	1	0	0	0	1	0	1	0	0	-0.6	Poor prognosis
28	2020.3.24	34651	胡军财	1	63	0	2	2	1.4	24.6181037747759	1111	1	1	0	1	0	1	0	0	0	1	-0.6	Poor prognosis
32	2021.11.1	41446	郭爱月	0	80	1	2	1.69897000433602	1.3	24.5	633	1	1	1	0	1	0	1	1	1	1	-0.39897	Poor prognosis
33	2021.4.12	39183	程双印	1	54	1	2	1.69897000433602	1.3	24.4	846	1	0	0	1	1	1	1	1	1	1	-0.39897	Poor prognosis
37	2022.2.23	42743	谷香莲	0	74	1	1	1.69897000433602	1.2	23.4	308	1	1	1	1	1	0	1	1	0	0	-0.49897	Poor prognosis
38	2020.11.17	37532	王文仲	1	71	0	2	1.69897000433602	1.2	25.3515413737155	136	1	0	0	1	0	1	0	1	1	0	-0.49897	Poor prognosis
40	2020.9.9	36711	乔增顺	1	67	0	3	1.69897000433602	1.1	20.8	737	1	1	1	0	1	0	1	1	1	1	-0.59897	Poor prognosis
41	2021.5.12	39121	苏现聚	1	77	1	1	1.30102999566398	1.1	26.7	182	0	0	0	1	0	1	0	0	0	1	-0.20103	Poor prognosis
42	2021.5.24	39733	林序周	1	77	1	2	1.30102999566398	1.1	25.7116620752984	750	1	1	1	1	1	1	1	1	1	0	-0.20103	Poor prognosis
43	2022.3.21	43077	聂改梅	0	84	1	2	1.69897000433602	1.1	22.5	334	1	1	1	0	0	0	1	1	1	1	-0.59897	Poor prognosis
44	2022.4.11	43298	朱富英	0	76	1	1	2	1	24.9134948096886	867	0	0	0	1	1	1	1	0	0	1	-1	Poor prognosis
45	2011.11.9	41540	朱守义	1	75	1	2	1.30102999566398	1	25.5	361	1	1	1	1	1	0	1	1	1	0	-0.30103	Poor prognosis
49	2021.5.31	39822	张迷彩	0	71	1	1	1.22184874961636	1	22.5	333	0	0	1	0	0	1	0	0	0	1	-0.221849	Poor prognosis
53	2021.3.8	38695	党静兰	0	71	0	3	1.30102999566398	1	24.9199003203987	848	1	0	1	0	1	0	1	1	0	1	-0.30103	Poor prognosis
54	2022.8.10	44773	刘建恩	1	71	1	2	1.22184874961636	1	24	521	0	1	1	1	1	1	0	0	1	0	-0.221849	Poor prognosis
55	2021.7.19	40369	路安彬	1	73	0	1	1.30102999566398	1	25.9515570934256	342	0	0	0	1	0	0	1	1	1	1	-0.30103	Poor prognosis
59	2020.7.22	36127	代臣	1	72	0	2	0.920818753952375	0.8	24.5	355	1	1	0	0	1	1	1	1	1	1	-0.120819	Poor prognosis
61	2022.4.19	43422	蔡春雨	1	69	0	2	1	0.8	26.8	454	0	1	1	1	1	1	1	1	1	1	-0.2	Poor prognosis
62	2021.7.19	40362	张桂姣	0	70	0	1	1.69897000433602	0.8	29.0547520661157	725	1	1	0	0	1	0	0	0	0	1	-0.89897	Poor prognosis
63	2022.2.26	42818	唐林	1	74	1	1	1.09691001300806	0.7	20.3125	250	1	0	0	0	1	0	1	1	0	0	-0.39691	Poor prognosis
64	2020.4.15	18283	晁迷芝	0	70	1	3	0.920818753952375	0.7	25	833	0	0	1	1	1	0	1	1	1	0	-0.220819	Poor prognosis
66	2022.4.12	43319	步书霞	0	52	0	2	1	0.7	29.1	419	0	0	1	1	1	1	1	0	0	1	-0.3	Poor prognosis
68	2024.6.23	44006	王衍贞	1	85	1	2	0.823908740944319	0.7	25.4	445	0	0	0	1	0	0	0	1	1	0	-0.123909	Poor prognosis
69	NA	NA	李树旺	1	74	0	3	1.3	0.7	22.7	1015	1	1	1	0	1	1	0	1	1	1	-0.6	Poor prognosis
70	2020.1.5	34118	张俊梅	0	67	1	3	1.09691001300806	0.7	22.2	277	1	0	0	1	1	1	1	1	1	0	-0.39691	Poor prognosis
71	2021.10.17	41258	李再丁	1	71	0	2	1.30102999566398	0.7	22.8928199791883	531	0	0	1	1	0	0	1	1	0	1	-0.60103	Poor prognosis
72	2020.7.13	28417	管新庄	1	86	0	2	0.920818753952375	0.6	23.1	499	1	1	1	0	1	0	1	0	1	1	-0.320819	Poor prognosis
75	2020.4.26	35058	闫瑞英	0	59	1	2	0.920818753952375	0.5	23.4	194	1	0	0	1	0	0	0	1	1	1	-0.420819	Poor prognosis
76	2021.2.20	38454	李素叶	0	63	1	2	0.698970004336019	0.5	23.1	421	0	0	1	1	1	0	1	1	0	0	-0.19897	Poor prognosis
77	2020.10.8	37005	李凤兰	0	69	0	3	1.09691001300806	0.5	23.9	507	1	0	1	0	1	1	0	0	1	1	-0.59691	Poor prognosis
79	2020.7.1	35829	向世银	1	75	0	1	0.602059991327962	0.5	29.4	232	0	0	0	1	1	1	1	1	1	0	-0.10206	Poor prognosis
80	2020.5.9	35237	吴风起	0	89	1	3	1.39794000867204	0.5	24.7	412	1	0	0	0	0	0	0	1	0	0	1	Poor prognosis
81	2020.7.1	35829	向世银	1	75	1	1	1.22184874961636	0.5	25.9515570934256	317	1	0	0	1	0	0	1	1	1	0	-0.721849	Poor prognosis
82	2021.4.7	39127	李金玉	1	70	0	3	0.698970004336019	0.5	26.5	191	0	1	1	0	0	1	0	1	0	0	-0.19897	Poor prognosis
83	2021.5.9	39509	刘从英	0	79	0	2	1	0.5	25.7	250	1	0	0	1	1	0	0	1	0	1	-0.5	Poor prognosis
84	2020.1.18	34268	焦文忠	1	66	0	3	0.698970004336019	0.5	23.6	258	1	0	0	1	0	1	1	1	0	1	-0.19897	Poor prognosis
85	2021.12.8	41815	郭章兰	1	77	1	2	1	0.5	23.6	810	1	0	1	0	1	1	0	1	1	0	-0.5	Poor prognosis
86	2020.8.8	36310	常进府	1	63	1	2	0.602059991327962	0.4	27.0551508844953	215	1	1	1	1	1	1	1	0	0	0	-0.20206	Poor prognosis
87	2021.5.16	39625	贾香蕊	0	54	1	2	0.522878745280338	0.4	21.5	450	1	1	1	0	0	0	0	1	1	1	-0.122879	Poor prognosis
89	2020.8.31	36613	吴焕军	1	66	1	3	0.920818753952375	0.4	29.0687732977668	460	1	0	0	1	1	0	0	0	0	0	-0.520819	Poor prognosis
90	2022.2.23	42777	管翠英	0	51	1	2	0.698970004336019	0.4	29.1	222	1	0	1	0	1	0	0	0	0	0	-0.29897	Poor prognosis
92	2022.1.4	42139	郭保起	1	74	1	1	0.823908740944319	0.4	23.0469	634	0	1	1	1	0	0	1	1	1	0	-0.423909	Poor prognosis
93	2021.3.24	38930	李雪芹	0	66	1	2	0.823908740944319	0.4	23.9	379	1	0	0	1	0	0	0	1	0	0	-0.423909	Poor prognosis
94	2022.2.14	42604	付改芹	0	58	0	1	0.698970004336019	0.3	28.7	367	0	1	1	0	1	1	1	1	1	0	-0.39897	Poor prognosis
95	2020.6.22	35771	陈保记	1	54	0	3	0.920818753952375	0.3	22.5	373	1	0	1	1	1	1	1	0	0	1	-0.620819	Poor prognosis
98	2021.3.24	38930	李雪芹	0	66	0	2	0.920818753952375	0.3	29.1	753	1	0	1	0	1	0	1	1	0	0	-0.620819	Poor prognosis
99	2021.4.7	39127	李金玉	1	70	1	3	0.397940008672038	0.2	23.9	223	0	0	1	1	0	0	1	1	1	0	-0.19794	Poor prognosis
100	2021.12.13	41131	魏伦义	1	76	1	2	0.602059991327962	0.2	23.3886865581877	193	1	0	1	1	1	1	1	0	1	0	-0.40206	Poor prognosis
